# Supplementary material for: Performance of computational algorithms to deconvolve heterogeneous bulk ovarian tumor tissue depends on experimental factors
Source: PubMed Central journal article supplement (PMC10588129; doi:10.1186/s13059-023-03077-7), 2023-10-20
Supplement: 13059_2023_3077_MOESM1_ESM.pdf [file 13059_2023_3077_MOESM1_ESM.pdf]

# Supporting Information for

## Performance of computational algorithms to deconvolve heterogeneous bulk tumor tissue depends on experimental factors

Hippen, Omran, Weber, Jung, Drapkin, Doherty, Hicks, and Greene

Casey S. Greene, e-mail: [casey.s.greene@cuanschutz.edu](mailto:casey.s.greene@cuanschutz.edu)

### This PDF file includes:

Tables S1 to S8

**Table S1. Number of demultiplexed cells, Batch A**

| Assignment | Hash (90% probability) | Hash (85% probability) | Hash (80% probability) | Genetic |
|------------|------------------------|------------------------|------------------------|---------|
| 2380       | 920                    | 958                    | 966                    | 1010    |
| 2267       | 1119                   | 1149                   | 1159                   | 1106    |
| 2283       | 578                    | 1204                   | 1737                   | 2862    |
| 2293       | 1629                   | 1663                   | 1674                   | 1720    |
| Unassigned | 2823                   | 2095                   | 1533                   | 48      |
| Multiplets | 286                    | 286                    | 286                    | 612     |

**Table S2. Number of demultiplexed cells, Batch B**

| Assignment | Hash (90% probability) | Hash (85% probability) | Hash (80% probability) | Genetic |
|------------|------------------------|------------------------|------------------------|---------|
| 2428       | 0                      | 15                     | 178                    | 306     |
| 2251       | 1215                   | 1220                   | 1225                   | 3773    |
| 2467       | 1095                   | 1126                   | 1137                   | 1904    |
| 2497       | 1424                   | 1470                   | 1492                   | 2942    |
| Unassigned | 5935                   | 5838                   | 5637                   | 150     |
| Multiplets | 145                    | 145                    | 145                    | 739     |

**Table S3. 20 most downregulated protein-coding genes in rRNA<sup>-</sup> Dissociated samples compared to rRNA<sup>-</sup> Chunk samples. Genes associated with erythrocytes and adipocytes are indicated.**

| Gene       | Mean normalized counts | log <sub>2</sub> Fold Change | BH-adjusted p-value | Notes        |
|------------|------------------------|------------------------------|---------------------|--------------|
| HBB        | 2264.20801             | -5.274949                    | 9.875591e-18        | Erythrocytes |
| HBA2       | 673.75110              | -4.757030                    | 1.107237e-12        | Erythrocytes |
| CXCR1      | 81.30936               | -4.189585                    | 2.141483e-05        |              |
| HBA1       | 181.66259              | -3.916449                    | 2.709565e-04        | Erythrocytes |
| LEP        | 659.43123              | -3.501804                    | 1.399598e-03        |              |
| PLIN1      | 4600.18340             | -3.360219                    | 5.274116e-03        | Adipocytes   |
| CIDEA      | 886.53878              | -3.343077                    | 3.829733e-03        | Adipocytes   |
| TEX48      | 2.97750                | -3.111579                    | 1.172056e-02        |              |
| FCGR3B     | 193.80341              | -2.994792                    | 5.661478e-06        |              |
| CXCR2      | 123.26475              | -2.902115                    | 4.611948e-05        |              |
| GPD1       | 2110.00336             | -2.864240                    | 2.950040e-03        | Adipocytes   |
| ALAS2      | 39.75417               | -2.832402                    | 8.931344e-08        | Erythrocytes |
| THRSP      | 111.35135              | -2.806047                    | 3.066181e-06        |              |
| TMC2       | 18.98199               | -2.726750                    | 4.035121e-04        |              |
| AL845331.2 | 29.66942               | -2.685222                    | 1.105572e-02        |              |
| ACVR1C     | 402.78381              | -2.561761                    | 6.530874e-04        | Adipocytes   |
| SLC7A10    | 173.51749              | -2.541003                    | 3.104534e-03        |              |
| BOD1L2     | 9.44344                | -2.524437                    | 4.159761e-02        |              |
| SERPINI2   | 37.79487               | -2.516106                    | 4.493992e-03        |              |
| BLID       | 10.53601               | -2.486332                    | 7.208722e-05        |              |

**Table S4. 20 most upregulated protein-coding genes in rRNA<sup>-</sup> Dissociated samples compared to rRNA<sup>-</sup> Chunk samples. Genes known to be part of dissociation response are indicated.**

| Gene    | Mean normalized counts | log <sub>2</sub> Fold Change | BH-adjusted p-value | Notes                 |
|---------|------------------------|------------------------------|---------------------|-----------------------|
| PYDC1   | 16.081991              | 5.920640                     | 2.510381e-06        |                       |
| PRR35   | 5.705105               | 4.920525                     | 9.804939e-05        |                       |
| AGXT    | 42.060301              | 4.605439                     | 6.884650e-08        |                       |
| EREG    | 1495.336882            | 4.372911                     | 3.934243e-12        |                       |
| CSF3    | 840.783269             | 4.324277                     | 2.777384e-03        |                       |
| ASTL    | 483.145817             | 4.295618                     | 8.735476e-18        |                       |
| HSPB3   | 13.932159              | 4.284497                     | 1.493207e-05        |                       |
| SELE    | 1265.716907            | 4.235680                     | 5.918690e-04        |                       |
| IL1B    | 5013.558651            | 4.040173                     | 5.868073e-12        |                       |
| TRIM72  | 51.103458              | 4.034666                     | 1.915679e-11        |                       |
| CXCL8   | 9524.606822            | 4.014204                     | 8.538524e-11        | Dissociation response |
| CTRB2   | 33.088482              | 3.981734                     | 6.685684e-06        |                       |
| KRT17   | 7909.537227            | 3.956979                     | 4.803680e-11        | Dissociation response |
| RNF223  | 70.229533              | 3.920271                     | 3.549464e-06        |                       |
| PMAIP1  | 1407.230059            | 3.904967                     | 5.615352e-17        | Dissociation response |
| CSF2    | 27.287446              | 3.879749                     | 4.848755e-08        |                       |
| ADRA2B  | 329.169429             | 3.857407                     | 1.808425e-26        |                       |
| CCL3L1  | 1773.033535            | 3.852048                     | 1.466380e-11        |                       |
| SLC32A1 | 2.625897               | 3.847003                     | 3.499084e-02        |                       |
| DLX2    | 6.076595               | 3.829267                     | 5.019865e-04        |                       |

**Table S5. 20 most downregulated protein-coding genes in polyA<sup>+</sup> Dissociated samples compared to rRNA<sup>-</sup> Dissociated samples. Histone and other non-polyadenylated genes are indicated.**

| Gene      | Mean normalized counts | log <sub>2</sub> Fold Change | BH-adjusted p-value | Notes    |
|-----------|------------------------|------------------------------|---------------------|----------|
| HIST1H4F  | 126.165209             | -7.584147                    | 3.336182e-28        | Histones |
| HIST1H1E  | 3875.456278            | -7.466552                    | 2.976823e-80        | Histones |
| HIST1H3I  | 97.949551              | -7.450876                    | 8.066728e-54        | Histones |
| HIST1H4L  | 28.497041              | -7.407631                    | 7.878764e-23        | Histones |
| HIST1H4B  | 195.566155             | -7.098757                    | 8.131410e-37        | Histones |
| HIST1H4A  | 130.716736             | -6.862988                    | 1.656545e-18        | Histones |
| HIST1H3F  | 259.470135             | -6.856573                    | 7.531311e-54        | Histones |
| HIST1H1B  | 658.088415             | -6.657982                    | 2.935287e-41        | Histones |
| HIST1H2BI | 183.101743             | -6.321904                    | 3.551740e-31        | Histones |
| HIST1H4C  | 319.913332             | -6.170677                    | 3.478121e-25        | Histones |
| HIST1H3B  | 446.961627             | -6.117763                    | 8.645489e-22        | Histones |
| HIST1H2AL | 99.268990              | -5.958138                    | 1.898573e-63        | Histones |
| HIST1H2AH | 167.281173             | -5.886553                    | 2.006220e-28        | Histones |
| HIST2H3C  | 7.649181               | -5.836300                    | 2.089754e-11        | Histones |
| HIST1H1D  | 1299.603334            | -5.819167                    | 6.793016e-54        | Histones |
| HIST1H1A  | 44.148276              | -5.803621                    | 6.418551e-30        | Histones |
| HIST2H3A  | 7.052000               | -5.689888                    | 1.010101e-10        | Histones |
| HIST1H2BB | 97.452607              | -5.633236                    | 2.247278e-25        | Histones |
| HIST1H2BO | 196.279002             | -5.567126                    | 1.466021e-56        | Histones |
| HIST1H3C  | 145.699517             | -5.561191                    | 1.495439e-15        | Histones |

**Table S6. 20 most upregulated protein-coding genes in polyA<sup>+</sup> Dissociated samples compared to rRNA<sup>-</sup> Dissociated samples. Mitochondrial genes are indicated.**

| Gene    | Mean normalized counts | log <sub>2</sub> Fold Change | BH-adjusted p-value | Notes    |
|---------|------------------------|------------------------------|---------------------|----------|
| MT-ND2  | 223569.28496           | 6.714580                     | <1.000000e-300      | MT Genes |
| MT-ATP8 | 19791.67322            | 6.220806                     | <1.000000e-300      | MT Genes |
| MT-ND4  | 386421.87891           | 6.108083                     | 3.046982e-245       | MT Genes |
| MT-ND6  | 40817.58973            | 5.924393                     | 3.221520e-157       | MT Genes |
| MT-ND1  | 237368.08644           | 5.816280                     | 1.000000e-300       | MT Genes |
| MT-ND5  | 186848.25525           | 5.633187                     | 2.989223e-110       | MT Genes |
| MT-ATP6 | 160911.26793           | 5.271319                     | 1.000000e-300       | MT Genes |
| MT-ND4L | 42080.11033            | 5.264596                     | 1.000000e-300       | MT Genes |
| MT-CYB  | 213642.50267           | 5.148185                     | 2.808655e-153       | MT Genes |
| MUC3A   | 440.12727              | 4.762839                     | 4.963931e-18        |          |
| MT-CO2  | 257358.23841           | 3.374991                     | 1.000000e-300       | MT Genes |
| HSPB6   | 112.11844              | 3.171346                     | 1.275501e-39        |          |
| NPIP3   | 394.45526              | 3.035222                     | 5.625690e-133       |          |
| ATN1    | 9071.84057             | 2.923674                     | 9.395034e-74        |          |
| NPIP13  | 24.24798               | 2.820896                     | 7.263615e-15        |          |
| MT-ND3  | 45933.08320            | 2.778239                     | 8.403991e-265       | MT Genes |
| MT-CO1  | 593951.60914           | 2.775620                     | 1.260887e-253       | MT Genes |
| RSPO4   | 59.22689               | 2.742839                     | 3.345901e-27        |          |
| IGF2    | 325.13770              | 2.674852                     | 2.523008e-14        |          |
| KCNC3   | 1137.67484             | 2.628585                     | 4.823953e-107       |          |

**Table S7. Number of cells per reference profile, real and simulated The "default" reference profile used only cells from Pool A and Pool B that were confidently assigned to a sample using genetic demultiplexing. The "hashing" used cells that were assigned to a sample by hash demultiplexing using Cell Ranger multi's default settings.**

| Cell type         | Default | Hashing | Sim2000 | Sim1000 | Sim500 | Sim200 |
|-------------------|---------|---------|---------|---------|--------|--------|
| B cells           | 323     | 214     | 43      | 22      | 11     | 4      |
| Dendritic cells   | 249     | 135     | 33      | 16      | 8      | 3      |
| Endothelial cells | 814     | 631     | 109     | 55      | 27     | 11     |
| Epithelial cells  | 1434    | 605     | 205     | 103     | 51     | 21     |
| Fibroblasts       | 3336    | 1139    | 458     | 230     | 114    | 46     |
| ILC               | 72      | 18      | 10      | 5       | 3      | 1      |
| Macrophages       | 1348    | 837     | 181     | 91      | 45     | 18     |
| Mast cells        | 39      | 24      | 6       | 3       | 1      | 1      |
| Monocytes         | 454     | 289     | 62      | 31      | 16     | 6      |
| NK cells          | 771     | 237     | 105     | 52      | 26     | 10     |
| pDC               | 159     | 112     | 21      | 11      | 5      | 2      |
| Plasma cells      | 759     | 335     | 107     | 54      | 27     | 11     |
| T cells           | 4850    | 2998    | 664     | 331     | 165    | 66     |
| Total             | 14608   | 7574    | 2004    | 1004    | 499    | 200    |



**Table S8. Cell score deconvolution methods. All methods used are open source and return cell type scores, with a focus on immune cells.**

| Method        | Implemented by                  | Uses scRNA-seq data | Availability |
|---------------|---------------------------------|---------------------|--------------|
| ABIS          | Monaco et al 2019 [61]          | No                  | R package    |
| Consensus_TME | Jiménez-Sánchez et al 2019 [62] | No                  | R package    |
| ImmuCellAI    | Miao et al 2020 [63]            | No                  | Web app      |
| MCPcounter    | Becht et al 2016 [64]           | No                  | R package    |
| quanTIseq     | Finotello et al 2019 [65]       | No                  | Bash script  |
| TIMER         | Li et al 2020 [66]              | No                  | R package    |
| XCell         | Aran et al 2017 [67]            | No                  | R package    |
